# Supplementary material for: High Bactericidal Self-Assembled Nano-Monolayer of Silver Sulfadiazine on Hydroxylated Material Surfaces
Source: PubMed Central journal article supplement (PMC6748069; doi:10.3390/ma12172761), 2019-08-28
Supplement: materials-12-02761-s001.pdf [file materials-12-02761-s001.pdf]

Supplementary Materials

# High Bactericidal Self-Assembled Nano-Monolayer of Silver Sulfadiazine on Hydroxylated Material Surfaces

Angelo Taglietti <sup>1,\*</sup>, Giacomo Dacarro <sup>1,\*</sup>, Daniele Barbieri <sup>1</sup>, Lucia Cucca <sup>1</sup>, Pietro Grisoli <sup>2</sup>, Maddalena Patrini <sup>3</sup>, Carla Renata Arciola <sup>4,5,\*</sup> and Piersandro Pallavicini <sup>1</sup>

<sup>1</sup> Dipartimento di Chimica, Sezione di Chimica Generale, Università di Pavia, viale Taramelli 12, 27100 Pavia, Italy

<sup>2</sup> Dipartimento di Scienze del Farmaco, Università di Pavia, viale Taramelli 10, 27100 Pavia, Italy

<sup>3</sup> Dipartimento di Fisica, "A. Volta", Università di Pavia, via Bassi 6, 27100 Pavia, Italy

<sup>4</sup> Laboratorio di Patologia delle Infezioni Associate all'Impianto, IRCCS Istituto Ortopedico Rizzoli, via di Barbiano 1/10, 40136 Bologna, Italy

<sup>5</sup> Department of Experimental, Diagnostic and Specialty Medicine, University of Bologna, via San Giacomo 14, 40126 Bologna, Italy

\* Correspondence: angelo.taglietti@unipv.it (A.T.); giacomo.dacarro@unipv.it (G.D.); carlarenata.arciola@ior.it (C.R.A.)

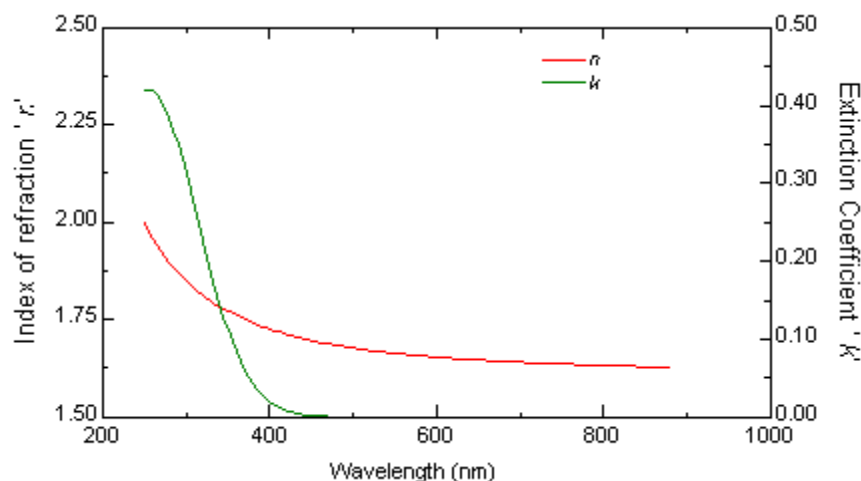

**Figure S1.** Spectroscopic Ellipsometry.

Optical functions for the SDM and AgSDM monolayers have been modeled with a Sellmeier-type behavior for the refractive index  $n$  (considering the value of 1.679 reported in the literature for plain sulfadiazine) joined to gaussian-like extinction coefficient  $k$  associated to the UV absorption band, centered at 255 nm.

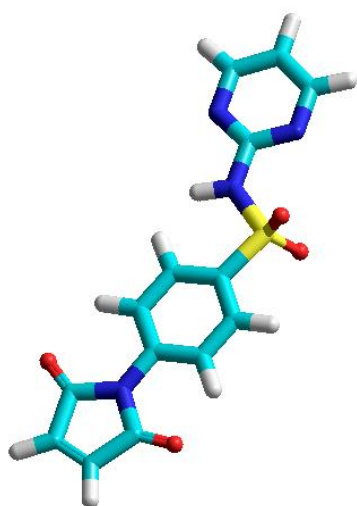

**Figure S2.** Sulfadiazine maleimide (SDM) PM3 model.

SDM molecular model obtained with a semi-empirical PM3 method. In its extended conformation SDM has a length of 1.3 nm (distance between a C atom of the maleimidic double bond and the terminal C atom of the pyrim).

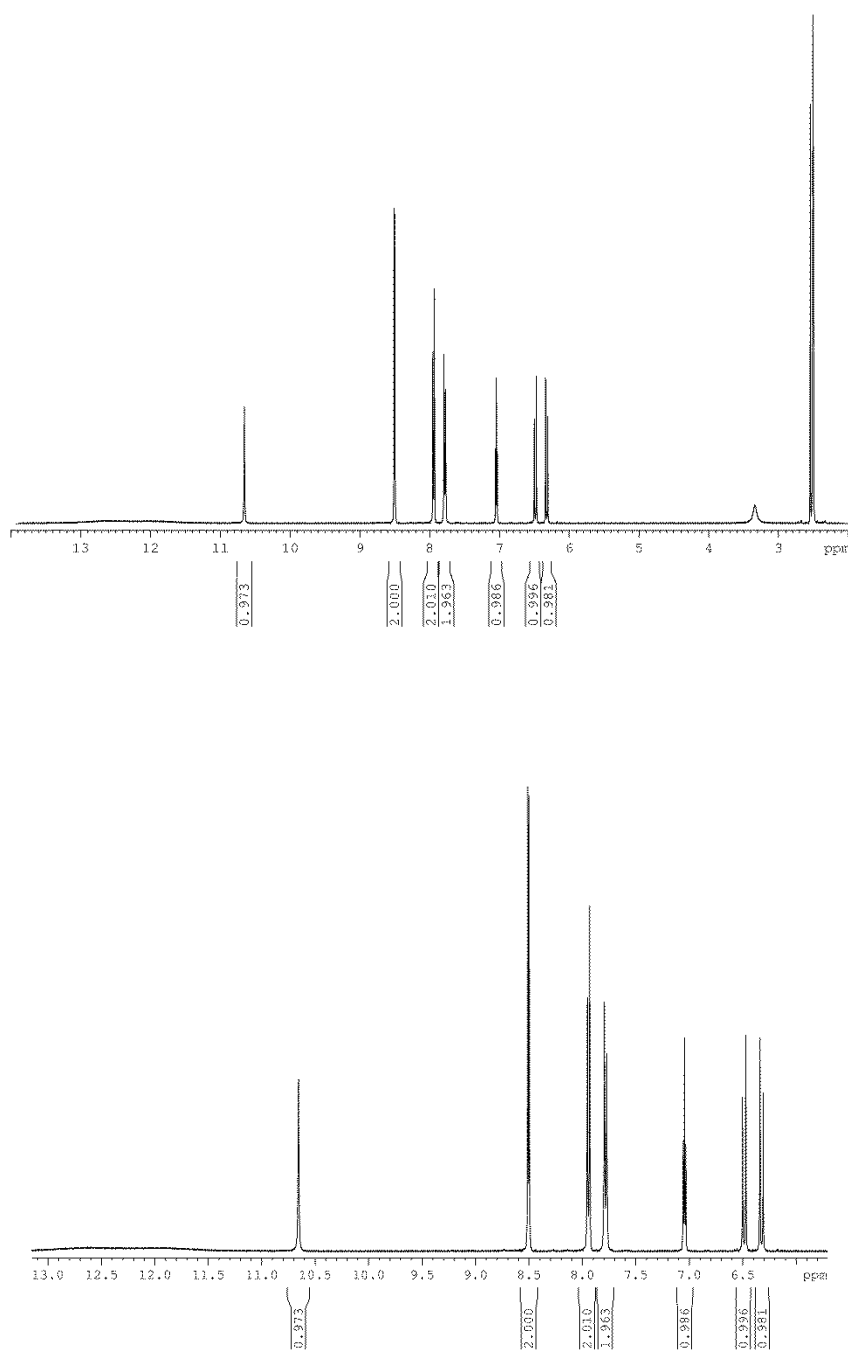

Figure S3. NMR spectra of SDMA (with enlarged zone of characteristic protons).

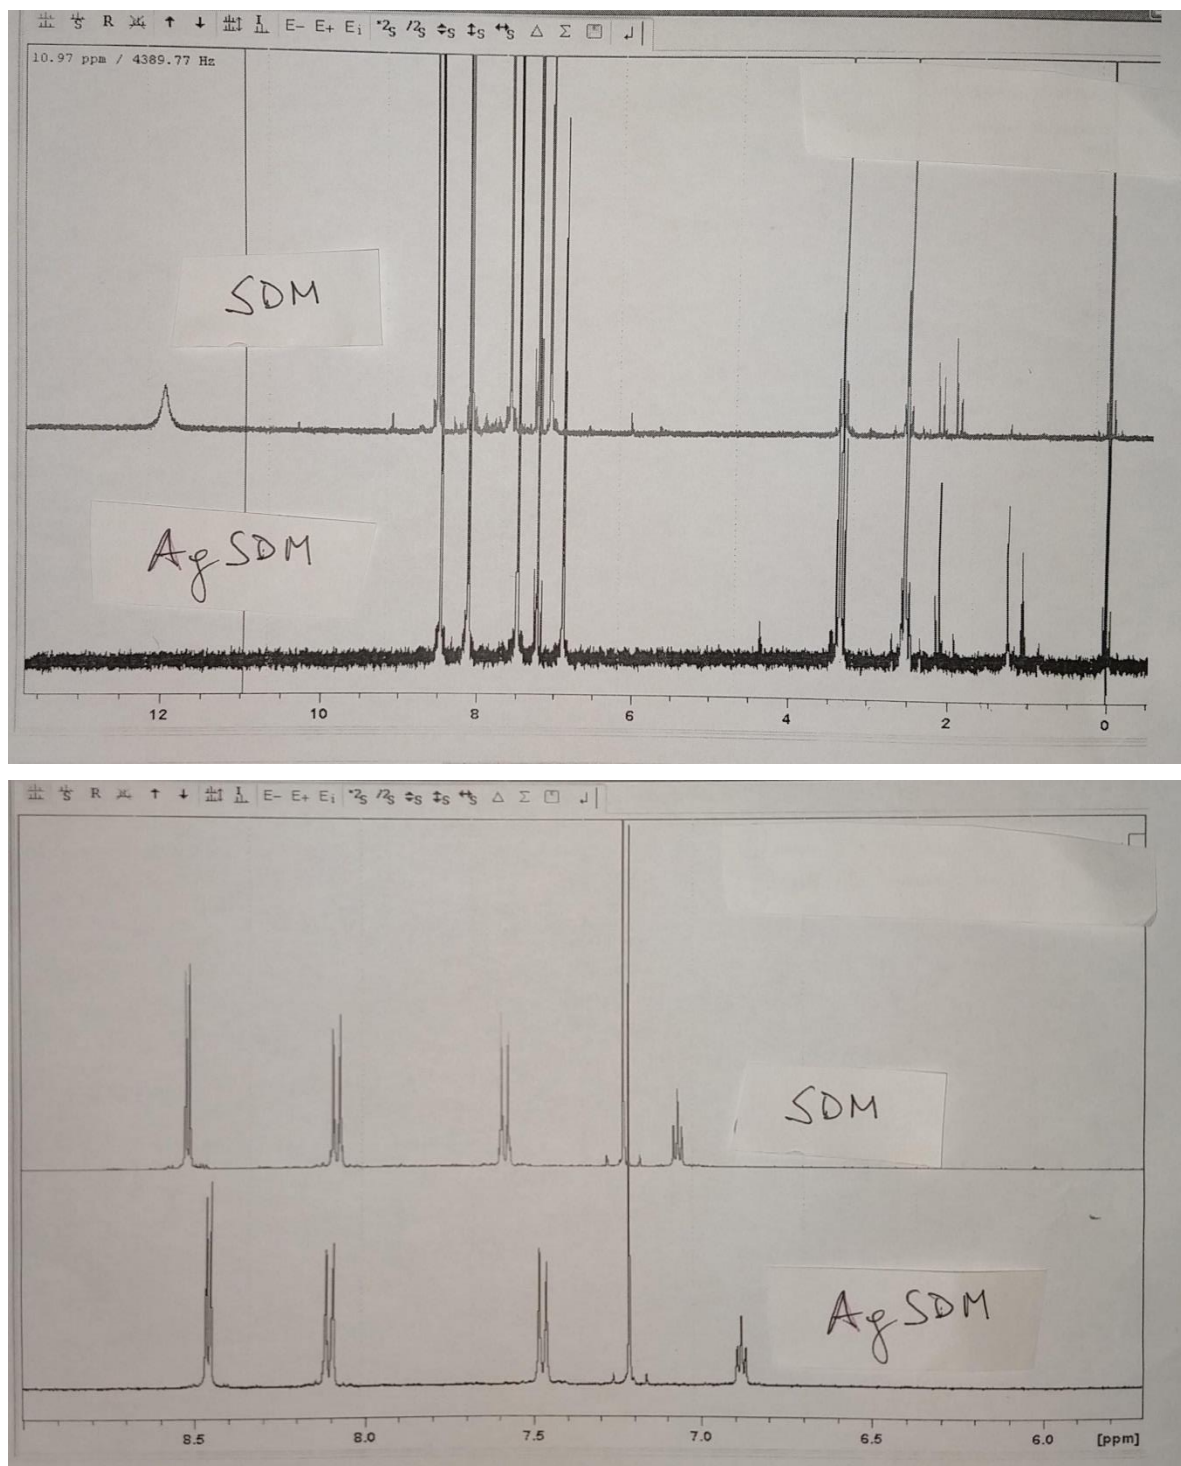

Figure S4. NMR Spectra for SDM and AgSDM (with enlarged zone of characteristic protons).
